# Supplementary material for: Mid-Infrared Spectroscopic Study of Cultivating Medicinal Fungi Ganoderma: Composition, Development, and Strain Variability of Basidiocarps
Source: MDPI journal article supplement (doi:10.3390/jof10010023), 2023-12-28
Supplement: s1 [file s1]

## Supplementary material

**Table S1**

Specification of the reference compounds

| Compound                          | Class           | Source                                            | Producer                                                   | FTIR       |
|-----------------------------------|-----------------|---------------------------------------------------|------------------------------------------------------------|------------|
| Gluten                            | Proteins        | Wheat grains ( <i>Triticum</i> sp.)               | Sigma-Aldrich (St. Louis, MO, USA)                         | KBr tablet |
| Chitin                            | Polysaccharides | Crab shells                                       | Sigma-Aldrich (St. Louis, MO, USA)                         | KBr tablet |
| Starch                            | Polysaccharides | Potato tubers ( <i>Solanum tuberosum</i> L.)      | Sigma-Aldrich (St. Louis, MO, USA)                         | KBr tablet |
| (1 → 3)- $\alpha$ -D-glucan       | Polysaccharides | Basidiocarps of <i>Pleurotus ostreatus</i>        | Cultivated by Ing. Rudolf Ryzner (Kojátky, Czech Republic) | KBr tablet |
| (1 → 3)(1 → 6)- $\beta$ -D-glucan | Polysaccharides | Baker's yeast ( <i>Saccharomyces cerevisiae</i> ) | Sigma-Aldrich (St. Louis, MO, USA)                         | KBr tablet |
| Seed oil                          | Fats            | Linseed ( <i>Linum usitatissimum</i> )            | Chain store                                                | ATR        |
| Ganoderic acids A, B and D        | Triterpenes     | Basidiocarps of <i>Ganoderma</i> sp.              | Sigma-Aldrich (St. Louis, MO, USA)                         | ATR        |

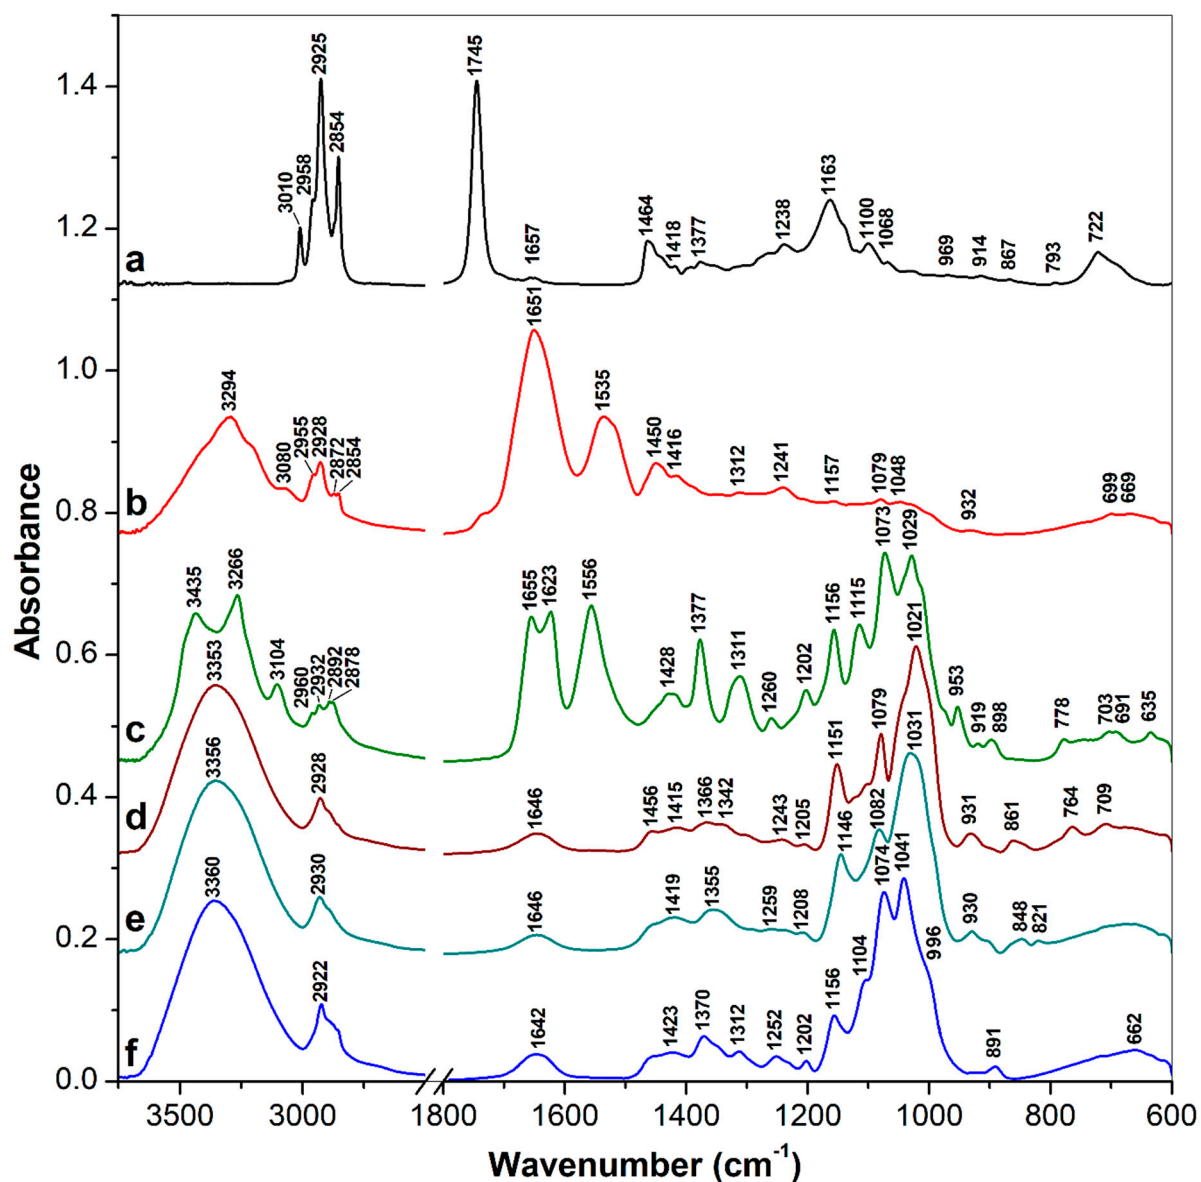

**Figure S1.** ATR-FTIR spectra of the reference compounds: (a) linseed oil, (b) wheat gluten, (c) chitin from crab shells, (d) corn starch, (e) fungal (1 → 3)-α-D-glucan, (f) yeast (1 → 3)(1 → 6)-β-D-glucan.

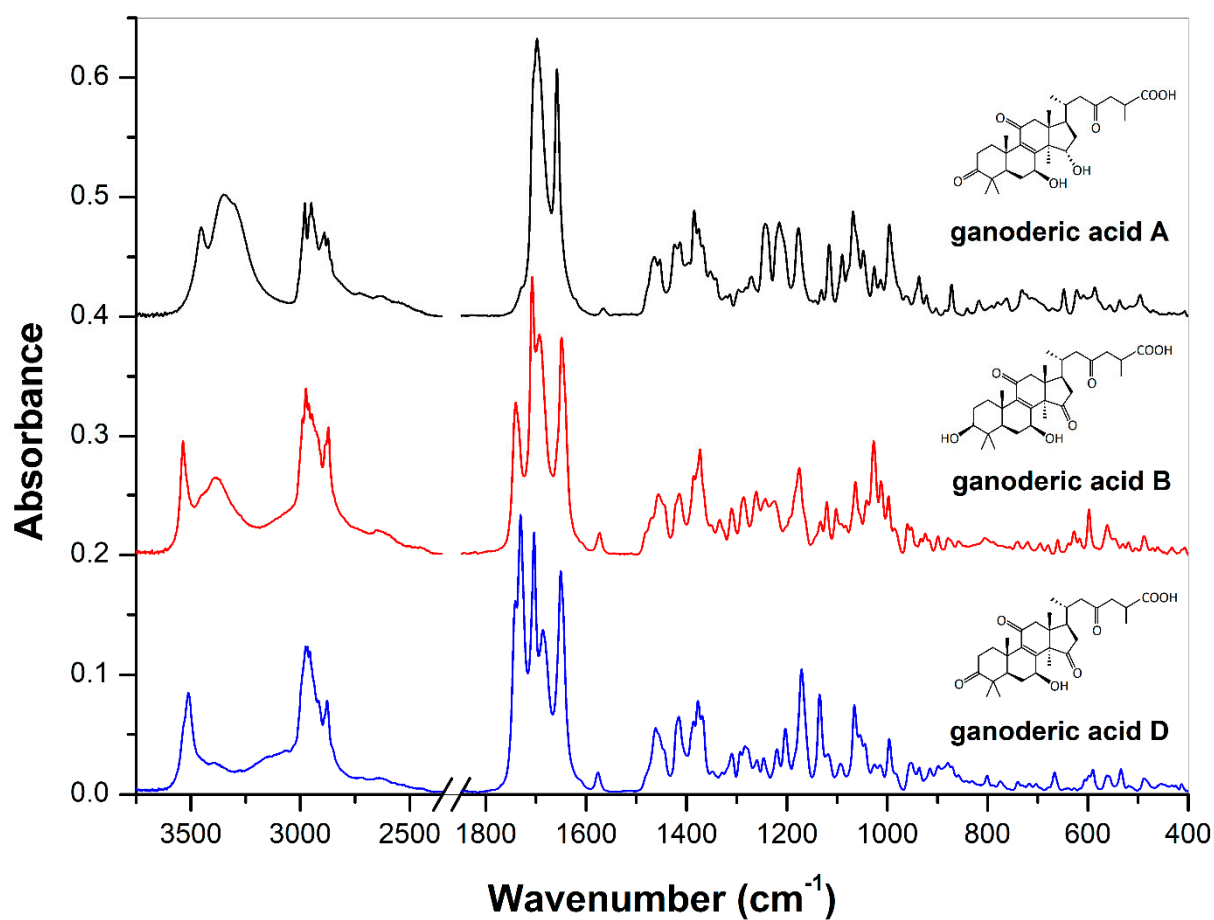

**Figure S2.** ATR-FTIR spectra of ganoderic acids A, B and D.

Table S2

Infrared band assignment for the triterpenoid-rich surface layers of *Ganoderma* basidiocarps in comparison with the reference data for ganoderic acids A, B and D \*

| Sample |        |        |        |        |        |        |        |        |        |        |        |        | Standards |        |        | Band assignment                                                  |
|--------|--------|--------|--------|--------|--------|--------|--------|--------|--------|--------|--------|--------|-----------|--------|--------|------------------------------------------------------------------|
| 1      | 4      | 5      | 6      | 7      | 8      | 9      | 10     | 11     | 12     | 13     | 14     | 15     | GA A      | GA B   | GA D   | [53,54,65–69]                                                    |
|        |        |        |        |        |        |        |        |        |        |        |        |        | 3452      | 3536   | 3511   | $\nu(\text{OH})$                                                 |
| 3301br | 3295br | 3356br | 3382br | 3373br | 3353br | 3332br | 3403br | 3394br | 3366br | 3380br | 3317br | 3303br | 3352br    | 3389br | 3393br | $\nu(\text{OH}), \nu(\text{H}_2\text{O})$                        |
| 2979sh | 2965sh | 2971sh | 2970sh | 2978sh | 2967   | 2967sh | 2965   | 2976sh | 2972sh | 2967   | 2975sh | 2973sh | 2979      | 2974   | 2973   | $\nu_{\text{as}}(\text{CH}_3)$                                   |
| 2960sh | 2956   | 2951sh | 2965   | 2970sh |        | 2956   |        | 2958sh | 2957   | 2952sh | 2956sh | 2956   | 2950      | 2961   | 2967   | $\nu_{\text{as}}(\text{CH}_3)$                                   |
| 2935sh | 2934sh | 2929   | 2931   |        |        | 2939sh | 2935   |        |        | 2930   | 2931sh | 2936sh |           | 2947   | 2956   | $\nu_{\text{as}}(\text{CH}_2)$                                   |
| 2924   | 2921   | 2919sh | 2920sh | 2929   | 2927   | 2921   | 2925sh | 2925   | 2925   | 2920sh | 2926   | 2925   |           | 2926   | 2918   | $\nu_{\text{as}}(\text{CH}_2)$                                   |
| 2902sh | 2898sh | 2896sh | 2907sh | 2898sh | 2901sh | 2902sh | 2907sh |        |        | 2897sh |        | 2903sh | 2890      | 2885   |        | $\nu(\text{CH})$                                                 |
| 2877   | 2875   | 2880   | 2880   | 2872sh | 2878   | 2877   | 2880   | 2875   | 2877   | 2876   | 2873   | 2878   | 2874      | 2872   | 2877   | $\nu_{\text{s}}(\text{CH}_3)$                                    |
| 2854   | 2852   | 2850sh | 2851sh | 2852sh | 2855   | 2851   | 2850sh | 2856   | 2854   | 2851sh | 2854   | 2854   | 2860      |        |        | $\nu_{\text{s}}(\text{CH}_2)$                                    |
| 2648sh | 2662sh | 2638sh | 2660sh | 2647sh | 2670sh | 2652sh | 2656sh | 2657sh | 2678sh | 2648sh | 2630sh | 2655sh | 2631br    | 2655br | 2639br | $\nu(\text{OH})_{\text{COOH}}$                                   |
| 1748sh | 1749sh | 1743sh | 1743sh | 1750sh | 1749sh | 1741sh | 1751sh | 1747sh | 1742sh | 1740sh | 1749sh | 1747sh |           | 1740   | 1741   | $\nu(\text{C}=\text{O})$ (5-m. ring)                             |
| 1726sh | 1737sh | 1735sh |        | 1737sh | 1731sh | 1727sh | 1735sh |        | 1734sh | 1728sh | 1725sh | 1731sh |           |        | 1731   | $\nu(\text{C}=\text{O})$ (5-m. ring)                             |
| 1703   | 1701   | 1699   | 1703   | 1703   | 1704   | 1703   | 1704   | 1704   | 1703   | 1704   | 1703   | 1702   | 1698      | 1708   | 1704   | $\nu(\text{C}=\text{O})$ (open chain)                            |
| 1678sh | 1685sh | 1688sh | 1687   | 1687sh | 1680sh |        |        |        | 1685sh |        | 1682sh | 1682sh |           | 1693   | 1686   | $\nu(\text{C}=\text{O})$ (6-m. ring)                             |
| 1657   | 1655   | 1657   | 1659   | 1648sh | 1658   | 1657   | 1665   | 1660   | 1657   | 1658   | 1657   | 1658   | 1659      | 1649   | 1651   | $\nu(\text{C}=\text{O})$ ( $\alpha,\beta$ -unsat.)               |
| 1580sh |        | 1586   | 1585   |        | 1581sh | 1579   |        | 1583sh |        |        | 1578   | 1578sh | 1566      | 1573   | 1577   | $\nu(\text{C}=\text{C})$                                         |
| 1472sh | 1469sh | 1471sh | 1471sh | 1469sh |        | 1471sh | 1468sh |        | 1467sh |        | 1471sh | 1470sh | 1464      | 1470   | 1462   | $\delta_{\text{as}}(\text{CH}_3)$ (ang.)                         |
| 1460   | 1459   | 1456   | 1455   | 1457   | 1461   | 1461   | 1457   | 1460   | 1457   | 1462   | 1460   | 1460   | 1453      | 1456   |        | $\delta_{\text{as}}(\text{CH}_3)$ (cycl.), $\delta(\text{CH}_2)$ |
| 1422sh | 1419sh | 1427sh | 1426sh | 1428   | 1426sh | 1423sh |        |        | 1429sh | 1424sh | 1423sh | 1426sh | 1424      |        |        | $\delta_{\text{as}}(\text{CH}_3)$ (open chain)                   |
| 1415   | 1415   | 1416sh | 1416   | 1413sh | 1411   | 1415   | 1415   | 1416   | 1412   | 1413   | 1417   | 1413   | 1413      | 1415   | 1416   | $\delta_{\text{as}}(\text{CH}_3)$ (cycl.), $\delta(\text{OH})$   |
| 1388sh | 1386sh | 1385sh | 1386sh | 1386sh | 1387sh | 1388sh |        |        | 1387sh | 1387sh | 1388sh | 1388sh | 1385      | 1386   | 1386   | $\delta_{\text{s}}(\text{CH}_3)$ (ang. 5/6 m. rings)             |

|        |        |        |        |        |        |        |        |        |        |        |        |        |      |          |      |                                                                                 |
|--------|--------|--------|--------|--------|--------|--------|--------|--------|--------|--------|--------|--------|------|----------|------|---------------------------------------------------------------------------------|
| 1380   | 1378   | 1378   | 1373   | 1377   | 1380   | 1379   | 1377   | 1381   | 1377   | 1379   | 1380   | 1379   | 1376 | 1373     | 1377 | $\delta_s(\text{CH}_3)$ (ang. 6/6 m. rings)                                     |
| 1364sh | 1363sh | 1362sh |        | 1362sh | 1363sh | 1363sh |        | 1363sh | 1362sh | 1364sh | 1364sh | 1363sh | 1368 |          | 1368 | $\omega(\text{CH}_2)$ , $\delta_s(\text{CH}_3)$ (cycl.)                         |
| 1346   |        | 1346sh | 1344sh | 1348sh | 1346sh | 1344sh | 1342sh | 1344sh | 1346sh | 1344sh | 1345   | 1347sh | 1353 | 1351     | 1348 | $\delta_s(\text{CH}_3)$ (open chain)                                            |
|        | 1339sh | 1334sh | 1333sh | 1332sh | 1339sh | 1331sh | 1332sh |        | 1332sh | 1334sh |        | 1333sh | 1341 | 1334     | 1329 | $\delta(\text{CH})$ , $\delta(\text{OH})$                                       |
| 1308sh | 1309sh | 1311   | 1311   | 1313   | 1314   | 1311sh | 1311sh | 1313sh | 1311sh | 1314sh | 1312sh | 1311sh | 1314 | 1309     | 1309 | $\delta(\text{CH})$                                                             |
|        |        |        |        |        |        |        |        |        |        |        |        |        | 1297 |          | 1293 |                                                                                 |
|        |        | 1284sh |        |        |        |        |        |        |        |        |        |        | 1281 | 1286     | 1283 | $\omega(\text{CH}_2)$                                                           |
| 1274   | 1274   |        | 1270   | 1271   | 1277   | 1277   | 1271sh | 1273   | 1273   | 1277   | 1275   | 1276   | 1271 | 1261     | 1259 | $\nu(\text{CC})$ , $\omega$ , $\tau(\text{CH}_2)$ , $\delta(\text{CH})$         |
| 1244   | 1247sh | 1243   | 1247   | 1249   | 1244   | 1245   | 1245   | 1245sh | 1247sh | 1246   | 1245   | 1242   | 1244 | 1243     | 1246 | $\delta(\text{OH})$ , $\nu(\text{CC})$ , $\delta(\text{CH})$                    |
| 1228sh | 1226   | 1224sh | 1239sh | 1227sh | 1227   |        | 1227sh | 1232   | 1230   |        | 1227sh | 1228   |      | 1225     | 1220 | $\nu(\text{CO})_{\text{acid, ester}}$                                           |
| 1216sh | 1212sh | 1207   | 1207   | 1208   | 1217sh | 1220sh | 1207sh | 1207sh | 1208   | 1219   | 1211sh | 1217sh | 1215 |          | 1203 | $\delta(\text{OH})$ , $\delta(\text{CH})$ , $\tau(\text{CH}_2)$                 |
| 1172   | 1174   | 1166sh | 1167sh | 1180   | 1175   | 1173   | 1175   | 1174   | 1175   | 1174   | 1173   | 1173   | 1177 | 1175     | 1171 | $\nu(\text{CC})$ , $\delta(\text{OH})$                                          |
| 1154sh | 1162sh | 1152sh | 1155sh | 1166sh | 1162sh | 1158sh | 1148   | 1145sh | 1149   | 1159sh | 1155sh | 1161sh | 1144 |          |      | $\nu(\text{CC})$ , $\tau(\text{CH}_2)$ , $\delta(\text{OH})$                    |
| 1135   | 1136   | 1137sh | 1134sh | 1140sh | 1134   | 1132sh |        |        | 1129sh | 1134   | 1131sh | 1133   | 1133 | 1133     | 1135 | $\nu(\text{CO})$ , $\delta(\text{OH})$ , $\tau(\text{CH}_2)$                    |
| 1113   | 1116   | 1115   | 1113   | 1114   | 1116   | 1114   | 1114   | 1113   | 1114   | 1115   | 1113   | 1115   | 1116 | 1120     | 1119 | $\nu(\text{CC})$ , ring vibrations                                              |
| 1098   |        | 1096   | 1095sh | 1099sh | 1098sh | 1101   |        | 1097sh | 1100sh | 1097sh | 1099   | 1097sh |      | 1102     |      | $\nu(\text{CC})$ , $\nu(\text{CO})$ , $\delta(\text{OH})$ , $\delta(\text{CH})$ |
|        | 1089   |        |        |        | 1086sh |        | 1080sh |        |        |        |        |        | 1090 | 1092     | 1093 | $\nu(\text{CC})$ , $\nu(\text{CO})$ , $\delta(\text{OH})$ , $\delta(\text{CH})$ |
|        |        | 1077sh | 1077   | 1078sh |        |        |        |        |        |        |        | 1086sh |      | 1083     |      | $\nu(\text{CC})$ , $\nu(\text{CO})$ , $\delta(\text{OH})$ , $\delta(\text{CH})$ |
| 1063   | 1065sh |        |        |        |        | 1063   | 1062sh | 1063sh | 1063sh | 1063   | 1064   |        | 1068 | 1064     | 1065 | $\nu(\text{CO})$ , ring breath                                                  |
|        |        |        | 1049   | 1055   | 1047   | 1051   |        | 1047   | 1049   | 1048   | 1052   |        |      |          | 1054 | $\nu(\text{CO})$ , ring breath                                                  |
| 1044   | 1042   | 1046   |        |        |        |        | 1038   |        |        |        |        | 1045   | 1047 | 1041     | 1044 | $\nu(\text{CO})$ , ring breath                                                  |
| 1025sh | 1028sh | 1036   | 1035   | 1035   | 1025sh | 1025sh |        |        |        | 1025sh | 1025sh | 1026sh | 1024 | 1027     | 1025 | $\omega(\text{CCH}_3)$                                                          |
| 1014sh | 1012sh | 1018   | 1016   | 1016   | 1015sh | 1015sh | 1014sh | 1016sh | 1013sh | 1014sh | 1015sh | 1014sh | 1013 | 1012     | 1014 | $\omega(\text{CCH}_3)$ , ring def.                                              |
| 997    | 997    | 992sh  | 993sh  | 1002sh | 997    | 996    | 991sh  | 995sh  | 992sh  | 996    | 997    | 997    | 996  | 997      | 996  | ring breath, $\delta(\text{CH})$                                                |
| 975sh  | 975sh  | 977    | 975    | 984sh  | 976sh  | 975sh  | 977sh  | 976sh  | 976sh  | 975sh  | 975sh  | 975sh  |      | 985      |      | $\nu(\text{CC})$ , $\delta(\text{CH})$                                          |
| 957    | 956    | 958sh  | 960sh  | 960sh  | 957    | 958    | 957sh  | 956sh  | 957sh  | 958    | 957    | 958    | 963  | 959, 952 | 952  | $\nu(\text{CC})$ , ring vibrations                                              |

|       |     |       |       |       |       |       |       |       |       |       |       |       |     |     |          |                                             |
|-------|-----|-------|-------|-------|-------|-------|-------|-------|-------|-------|-------|-------|-----|-----|----------|---------------------------------------------|
| 941   | 940 | 941   | 938   | 941   | 941   | 937sh | 930   | 939sh | 938sh | 941   | 939   | 941   | 936 | 933 | 936      | v(CC), $\omega$ (CCH <sub>3</sub> )         |
| 919   | 922 | 921   | 926   | 921   | 920   |       |       |       |       |       |       | 921   | 922 | 925 |          | v(CC), $\rho$ (CH <sub>2</sub> )            |
|       |     |       |       |       |       | 918   | 916sh | 918sh | 919sh | 919   | 918   |       |     | 917 | 915      |                                             |
| 892   | 899 | 905   | 884   | 886   | 895   | 891   | 903sh | 895sh | 904   | 892   | 892   | 893   | 903 | 899 | 899      | v(CC), ring def.                            |
| 876   | 876 |       |       |       | 876   | 876   |       | 881   | 874   | 875   | 876   | 875   |     | 879 | 879      | ring vibr., $\rho$ (CH <sub>2</sub> )       |
|       |     | 868   | 868   | 867   |       |       | 869   |       |       |       |       |       | 872 |     | 871      |                                             |
|       |     |       | 846   |       |       |       | 848   | 845sh | 850sh |       |       |       |     | 858 | 858      | v(CC), ring def.                            |
| 842   | 841 | 843   |       | 842   | 832   | 840   |       |       |       | 838   | 840   | 836   | 841 |     | 842, 831 |                                             |
| 812   | 821 | 814   | 813   | 813   | 818   | 813   | 815   | 813   | 813   | 815   | 812   | 815   | 818 | 806 | 801      | v(CC), ring def., $\rho$ (CH <sub>2</sub> ) |
| 793   | 791 | 800sh | 798sh | 798sh | 793   | 796   | 799   | 793   | 791   | 795   | 794   | 790   | 793 | 789 | 790      | v(CC), $\rho$ (CH <sub>2</sub> )            |
| 773sh | 779 | 778   | 779   | 778   | 770sh | 776   | 769   | 769sh | 776sh | 769sh | 779   | 779   | 780 | 775 | 774      | v(CC), ring def.                            |
| 742   | 743 | 744   | 742   | 742sh | 742   | 743   | 745sh | 748sh | 744sh | 744   | 743   | 743   | 762 | 756 |          | open chain def.                             |
| 718   | 721 | 724sh | 717sh | 721sh | 719   | 720   | 721sh | 723sh | 719sh | 723   | 717   | 719   | 732 | 741 | 740      | ring and open chain def.                    |
| 693   | 709 | 712sh | 699sh | 714   | 706sh | 709sh | 713sh | 717   | 715   | 714   |       |       | 713 | 720 | 717      | ring def.                                   |
|       | 696 | 698sh |       | 696sh | 695   | 695   | 700sh | 700sh | 695sh | 700   | 696   | 703sh |     | 695 | 703      | ring vibr.                                  |
| 682sh | 687 | 685sh | 683   | 681   |       |       | 687sh | 684sh | 671sh |       | 684sh | 683   |     | 680 |          | ring vibr.                                  |
| 668   | 673 | 677   | 669   | 661   | 668   | 669   | 669   |       | 663sh | 666   | 667   | 671   | 670 | 661 | 666      | ring vibr.                                  |
| 651   | 650 | 650   | 642sh |       | 651   | 649   |       |       | 649sh | 651   | 650   | 652   | 648 | 638 | 639      | $\delta$ (CCC), $\delta$ (CCO)              |

\* GA, ganoderic acid; br, broad; sh, shoulder; v, stretching; as, antisymmetric; s, symmetric; vibr., vibration, def., deformation; 5(6)-m., 5/6 m., five(six)-member; unsat., unsaturated; ang., angle; ang. 5/6 m., angle between the five-member and six-member rings; cycl., cyclic;  $\delta$ , (in-plane) bending vibration;  $\omega$ , wagging vibration;  $\tau$ , twisting vibration;  $\rho$ , rocking vibration.
